# Supplementary material for: Public Health Significance of Prevalence and Risk Factors Associated With Toxoplasma Gondii Infection in Goats in Maiduguri Metropolis, Borno State, Nigeria
Source: Research Square preprint supplement (doi:10.21203/rs.3.rs-7553149/v1), 2025-10-13
Supplement: Supplementary file 1 [file db7e267b4eedd7ca86bd0d84.pdf]

## Toxoplasmosis ELISA in Goats in Maiduguri

| Sex    | Age (yrs) | Age_Grp      | Weight (Kg) | BCS      | Parity | Parity_grp | Clinical_Signs           | OD_Reading | SP_percent | status   | location     |
|--------|-----------|--------------|-------------|----------|--------|------------|--------------------------|------------|------------|----------|--------------|
| Female | 3         | >2 – 3 years | 18          | Moderate | 2      | Parity 2   | Normal                   | 0.424      | 21.26      | Negative | Old GRA site |
| Female | 3         | >2 – 3 years | 14          | Moderate | 2      | Parity 2   | Occular/Nasal discharges | 0.494      | 74.52      | Positive | Old GRA site |
| Female | 1         | 1 – 2 years  | 15          | Moderate | 1      | Parity 1   | Rouh hair coat           | 0.795      | 43.66      | Positive | Old GRA site |
| Female | 1.5       | 1 – 2 years  | 18          | Moderate | 1      | Parity 1   | Normal                   | 0.58       | 30.68      | Negative | Old GRA site |
| Female | 1         | 1 – 2 years  | 17          | Moderate | 1      | Parity 1   | Normal                   | 0.476      | 24.4       | Negative | Old GRA site |
| Female | 3         | >2 – 3 years | 17          | Moderate | 1      | Parity 1   | Normal                   | 0.501      | 25.91      | Negative | Old GRA site |
| Female | 1         | 1 – 2 years  | 16          | Moderate | 1      | Parity 1   | Normal                   | 0.611      | 32.55      | Negative | Old GRA site |
| Female | 3         | >2 – 3 years | 22          | Moderate | 2      | Parity 2   | Nasal discharge          | 0.489      | 25.18      | Negative | Old GRA site |
| Female | 3         | >2 – 3 years | 18          | Lean     | 3      | Parity 3   | Normal                   | 0.737      | 40.16      | Positive | Old GRA site |
| Male   | 1.5       | 1 – 2 years  | 15          | Lean     |        |            | Normal                   | 2.178      | 127.17     | Positive | Old GRA site |
| Female | 1.5       | 1 – 2 years  | 15          | Moderate | 1      | Parity 1   | Normal                   | 1.874      | 108.82     | Positive | Old GRA site |
| Female | 1.5       | 1 – 2 years  | 17          | Moderate | 2      | Parity 2   | Normal                   | 0.267      | 11.78      | Negative | Old GRA site |
| Female | 2.5       | >2 – 3 years | 18          | Moderate | 2      | Parity 2   | Normal                   | 0.439      | 22.16      | Negative | Old GRA site |
| Female | 3         | >2 – 3 years | 17          | Moderate | 1      | Parity 1   | Normal                   | 0.405      | 20.11      | Negative | Old GRA site |
| Male   | 3         | >2 – 3 years | 21          | Lean     | 2      |            | Normal                   | 0.313      | 14.55      | Negative | Old GRA site |
| Male   | 1         | 1 – 2 years  | 18          | Moderate |        |            | Normal                   | 0.156      | 5.07       | Negative | Old GRA site |
| Male   | 1.5       | 1 – 2 years  | 19          | Moderate |        |            | Normal                   | 0.426      | 21.38      | Negative | Old GRA site |
| Female | 3         | >2 – 3 years | 24          | Fat      | 3      | Parity 3   | Normal                   | 0.277      | 12.38      | Negative | Old GRA site |
| Male   | 1         | 1 – 2 years  | 16          | Fat      |        |            | Normal                   | 0.616      | 32.85      | Negative | Old GRA site |
| Female | 1         | 1 – 2 years  | 18          | Lean     | 1      | Parity 1   | Normal                   | 0.148      | 4.59       | Negative | Old GRA site |
| Female | 2         | 1 – 2 years  | 16          | Lean     | 1      | Parity 1   | Normal                   | 0.123      | 3.08       | Negative | Old GRA site |
| Female | 2         | 1 – 2 years  | 20          | Lean     | 1      | Parity 1   | Normal                   | 2.389      | 139.92     | Positive | Old GRA site |
| Male   | 2.5       | >2 – 3 years | 16          | Fat      |        |            | Normal                   | 0.5        | 25.85      | Negative | Old GRA site |
| Female | 1.5       | 1 – 2 years  | 15          | Moderate | 2      | Parity 2   | Nasal discharge          | 0.133      | 3.66       | Negative | Old GRA site |
| Female | 1.5       | 1 – 2 years  | 15          | Lean     | 2      | Parity 2   | Other ailments           | 0.321      | 15.01      | Negative | Old GRA site |
| Female | 3         | >2 – 3 years | 22          | Moderate | 4      | Parity 4   | Occular/Nasal discharges | 0.499      | 25.79      | Negative | Old GRA site |
| Male   | 2.5       | >2 – 3 years | 19          | Moderate |        |            | Normal                   | 0.212      | 8.45       | Negative | Old GRA site |
| Male   | 1.5       | 1 – 2 years  | 16          | Moderate |        |            | Normal                   | 0.564      | 29.71      | Negative | Old GRA site |
| Female | 3         | >2 – 3 years | 21          | Fat      | 3      | Parity 3   | Normal                   | 0.109      | 2.23       | Negative | Old GRA site |

| Sex    | Age (yrs) | Age_Grp      | Weight (Kg) | BCS      | Parity | Parity_grp         | Clinical_Signs  | OD_Reading | SP_percent | status   | location     |
|--------|-----------|--------------|-------------|----------|--------|--------------------|-----------------|------------|------------|----------|--------------|
| Female | 1.5       | 1 – 2 years  | 16          | Fat      | 1      | Parity 1           | Normal          | 0.158      | 5.19       | Negative | Old GRA site |
| Female | 3         | >2 – 3 years | 21          | Lean     | 2      | Parity 2           | Diarrhoea       | 0.3        | 13.77      | Negative | Old GRA site |
| Male   | 2         | 1 – 2 years  | 20          | Lean     |        |                    | Diarrhoea       | 0.199      | 7.67       | Negative | Old GRA site |
| Female | 2.5       | >2 – 3 years | 14          | Moderate | 2      | Parity 2           | Normal          | 0.404      | 20.05      | Negative | Old GRA site |
| Female | 1         | 1 – 2 years  | 16          | Lean     | 2      | Parity 2           | Normal          | 0.627      | 33.51      | Negative | Old GRA site |
| Female | 4         | >3 years     | 23          | Fat      | 5      | Parity 5 and above | Normal          | 0.346      | 16.55      | Negative | Old GRA site |
| Female | 1.5       | 1 – 2 years  | 18          | Moderate | 2      | Parity 2           | Normal          | 0.418      | 20.89      | Negative | Old GRA site |
| Female | 1.5       | 1 – 2 years  | 17          | Moderate | 1      | Parity 1           | Normal          | 0.473      | 24.21      | Negative | Old GRA site |
| Female | 2         | 1 – 2 years  | 21          | Moderate | 2      | Parity 2           | Normal          | 0.507      | 26.27      | Negative | Old GRA site |
| Male   | 2.5       | >2 – 3 years | 18          | Moderate |        |                    | Normal          | 0.441      | 22.28      | Negative | Old GRA site |
| Male   | 1.5       | 1 – 2 years  | 18          | Moderate |        |                    | Normal          | 0.381      | 18.66      | Negative | Old GRA site |
| Female | 2         | 1 – 2 years  | 18          | Lean     | 1      | Parity 1           | Normal          | 0.227      | 9.36       | Negative | Old GRA site |
| Male   | 3         | >2 – 3 years | 15          | Moderate |        |                    | Nasal discharge | 0.411      | 20.47      | Negative | Old GRA site |
| Female | 3         | >2 – 3 years | 18          | Moderate | 4      | Parity 4           | Other ailments  | 0.453      | 23.01      | Negative | Old GRA site |
| Female | 1.5       | 1 – 2 years  | 18          | Moderate | 1      | Parity 1           | Nasal discharge | 0.312      | 14.49      | Negative | Old GRA site |
| Female | 1.5       | 1 – 2 years  | 15          | Lean     | 1      | Parity 1           | Rough hair coat | 2.877      | 169.38     | Positive | Old GRA site |
| Female | 3         | >2 – 3 years | 22          | Fat      | 2      | Parity 2           | Normal          | 0.358      | 17.27      | Negative | Old GRA site |
| Male   | 2         | 1 – 2 years  | 20          | Moderate |        |                    | Normal          | 0.19       | 7.13       | Negative | Old GRA site |
| Female | 3         | >2 – 3 years | 21          | Moderate | 4      | Parity 4           | Normal          | 0.243      | 10.33      | Negative | Old GRA site |
| Female | 4         | >3 years     | 24          | Moderate | 5      | Parity 5 and above | Normal          | 0.178      | 6.4        | Negative | Old GRA site |
| Female | 3         | >2 – 3 years | 20          | Moderate | 4      | Parity 4           | Normal          | 1.943      | 112.98     | Negative | Old GRA site |
| Female | 1         | 1 – 2 years  | 18          | Moderate | 1      | Parity 1           | Normal          | 0.253      | 10.93      | Negative | Old GRA site |
| Male   | 1.5       | 1 – 2 years  | 15          | Lean     |        |                    | Normal          | 0.499      | 25.79      | Negative | Old GRA site |
| Female | 3         | >2 – 3 years | 20          | Lean     | 5      | Parity 5 and above | Normal          | 2.91       | 171.38     | Positive | Old GRA site |
| Male   | 2.5       | >2 – 3 years | 15          | Moderate |        |                    | Normal          | 0.618      | 32.97      | Negative | Old GRA site |
| Male   | 1         | 1 – 2 years  | 12          | Moderate |        |                    | Normal          | 0.137      | 3.93       | Negative | Old GRA site |
| Female | 3         | >2 – 3 years | 22          | Moderate | 4      | Parity 4           | Normal          | 0.466      | 23.79      | Negative | Old GRA site |
| Female | 3         | >2 – 3 years | 19          | Moderate | 3      | Parity 3           | Normal          | 0.237      | 9.96       | Negative | Old GRA site |
| Female | 3         | >2 – 3 years | 18          | Moderate | 4      | Parity 4           | Normal          | 0.116      | 2.66       | Negative | Old GRA site |
| Female | 3         | >2 – 3 years | 18          | Lean     | 2      | Parity 2           | Normal          | 0.3        | 13.77      | Negative | Old GRA site |
| Male   | 2         | 1 – 2 years  | 19          | Moderate |        |                    | Normal          | 0.263      | 11.53      | Negative | Old GRA site |

| Sex    | Age (yrs) | Age_Grp      | Weight (Kg) | BCS      | Parity | Parity_grp         | Clinical_Signs          | OD_Reading | SP_percent | status   | location      |
|--------|-----------|--------------|-------------|----------|--------|--------------------|-------------------------|------------|------------|----------|---------------|
| Female | 4         | >3 years     | 20          | Moderate | 5      | Parity 5 and above | Nasal discharge         | 0.369      | 17.93      | Negative | Old GRA site  |
| Male   | 2         | 1 – 2 years  | 20          | Moderate |        |                    | Normal                  | 0.321      | 15.04      | Negative | Old Maiduguri |
| Male   | 1.5       | 1 – 2 years  | 17          | Moderate |        |                    | Normal                  | 0.57       | 30.07      | Negative | Old Maiduguri |
| Male   | 3         | >2 – 3 years | 22          | Moderate |        |                    | Normal                  | 0.376      | 18.36      | Negative | Old Maiduguri |
| Female | 3         | >2 – 3 years | 23          | Moderate | 4      | Parity 4           | Normal                  | 0.374      | 18.24      | Negative | Old Maiduguri |
| Female | 2         | 1 – 2 years  | 22          | Moderate | 2      | Parity 2           | Normal                  | 0.321      | 15.04      | Negative | Old Maiduguri |
| Female | 3         | >2 – 3 years | 24          | Moderate | 4      | Parity 4           | Normal                  | 0.29       | 13.16      | Negative | Old Maiduguri |
| Male   | 3         | >2 – 3 years | 15          | Moderate |        |                    | Normal                  | 0.28       | 12.56      | Negative | Old Maiduguri |
| Female | 2         | >2 – 3 years | 21          | Fat      | 2      | Parity 2           | Normal                  | 0.467      | 23.85      | Negative | Old Maiduguri |
| Female | 1.5       | 1 – 2 years  | 15          | Moderate | 1      | Parity 1           | Normal                  | 0.5        | 25.85      | Negative | Old Maiduguri |
| Male   | 2         | 1 – 2 years  | 21          | Fat      |        |                    | Normal                  | 0.86       | 47.58      | Positive | Old Maiduguri |
| Female | 3         | >2 – 3 years | 14          | Fat      | 4      | Parity 4           | Normal                  | 0.587      | 31.1       | Negative | Old Maiduguri |
| Male   | 2         | 1 – 2 years  | 22          | Moderate |        |                    | Normal                  | 0.461      | 23.49      | Negative | Old Maiduguri |
| Female | 2         | 1 – 2 years  | 18          | Moderate | 2      | Parity 2           | Normal                  | 0.701      | 37.98      | Negative | Old Maiduguri |
| Female | 2.5       | >2 – 3 years | 18          | Lean     | 1      | Parity 1           | Diarrhoea               | 0.626      | 33.45      | Negative | Old Maiduguri |
| Female | 2         | 1 – 2 years  | 14          | Lean     | 1      | Parity 1           | Rough hair coat         | 0.353      | 16.97      | Negative | Old Maiduguri |
| Female | 3         | >2 – 3 years | 26          | Fat      | 3      | Parity 4           | Normal                  | 0.212      | 8.45       | Negative | Old Maiduguri |
| Female | 2         | 1 – 2 years  | 15          | Lean     | 1      | Parity 1           | Ocular/Nasal discharges | 0.564      | 29.71      | Negative | Old Maiduguri |
| Female | 2         | 1 – 2 years  | 18          | Fat      | 2      | Parity 2           | Normal                  | 0.885      | 49.09      | Positive | Old Maiduguri |
| Female | 2         | 1 – 2 years  | 18          | Moderate | 2      | Parity 2           | Normal                  | 0.644      | 34.54      | Negative | Old Maiduguri |
| Female | 5         | >3 years     | 18          | Lean     | 4      | Parity 4           | Rough hair coat         | 0.212      | 8.45       | Negative | Old Maiduguri |
| Male   | 2         | 1 – 2 years  | 18          | Moderate |        |                    | Normal                  | 0.139      | 4.05       | Negative | Old Maiduguri |
| Female | 1         | 1 – 2 years  | 16          | Lean     | 1      | Parity 2           | Normal                  | 0.263      | 11.53      | Negative | Old Maiduguri |
| Male   | 2         | 1 – 2 years  | 16          | Moderate |        |                    | Normal                  | 0.206      | 8.09       | Negative | Old Maiduguri |
| Male   | 2         | 1 – 2 years  | 16          | Moderate |        |                    | Normal                  | 0.411      | 20.47      | Negative | Old Maiduguri |
| Male   | 1.5       | 1 – 2 years  | 16          | Lean     |        |                    | Normal                  | 0.592      | 31.4       | Negative | Old Maiduguri |
| Female | 2         | 1 – 2 years  | 17          | Lean     | 2      | Parity 2           | Normal                  | 0.24       | 10.14      | Negative | Old Maiduguri |
| Male   | 1         | 1 – 2 years  | 18          | Moderate |        |                    | Normal                  | 0.152      | 4.83       | Negative | Old Maiduguri |
| Male   | 1         | 1 – 2 years  | 17          | Moderate |        |                    | Normal                  | 0.3        | 13.77      | Negative | Old Maiduguri |
| Male   | 2         | 1 – 2 years  | 17          | Lean     |        |                    | Normal                  | 0.199      | 7.67       | Negative | Old Maiduguri |
| Female | 2         | 1 – 2 years  | 18          | Lean     | 3      | Parity 3           | Other ailments          | 1.896      | 110.14     | Positive | Old Maiduguri |

| Sex    | Age (yrs) | Age_Grp      | Weight (Kg) | BCS      | Parity | Parity_grp | Clinical_Signs           | OD_Reading | SP_percent | status   | location                 |
|--------|-----------|--------------|-------------|----------|--------|------------|--------------------------|------------|------------|----------|--------------------------|
| Female | 1         | 1 – 2 years  | 16          | Lean     | 2      | Parity 2   | Occular/Nasal discharges | 1.474      | 84.66      | Positive | Old Maiduguri            |
| Male   | 1         | 1 – 2 years  | 18          | Lean     |        |            | Diarrhoea                | 1.456      | 83.57      | Positive | Old Maiduguri            |
| Male   | 1.5       | 1 – 2 years  | 16          | Lean     |        |            | Occular/Nasal discharges | 1.453      | 83.39      | Positive | Old Maiduguri            |
| Female | 2         | 1 – 2 years  | 18          | Lean     | 2      | Parity 2   | Rouh hair coat           | 2.621      | 153.93     | Positive | Old Maiduguri            |
| Male   | 2         | 1 – 2 years  | 18          | Moderate |        |            | Normal                   | 0.28       | 12.56      | Negative | Old Maiduguri            |
| Female | 1         | 1 – 2 years  | 18          | Lean     | 1      | Parity 1   | Normal                   | 2.468      | 144.69     | Positive | Old GRA site             |
| Female | 2         | 1 – 2 years  | 18          | Lean     | 3      | Parity 3   | Normal                   | 2.468      | 144.69     | Positive | Old GRA site             |
| Male   | 1.5       | 1 – 2 years  | 17          | Moderate |        |            | Normal                   | 0.419      | 20.95      | Negative | Old Maiduguri            |
| Female | 1         | 1 – 2 years  | 16          | Lean     | 1      | Parity 1   | Normal                   | 2.048      | 119.32     | Positive | Old Maiduguri            |
| Female | 2         | 1 – 2 years  | 18          | Moderate | 2      | Parity 2   | Normal                   | 2.766      | 162.68     | Positive | Old Maiduguri            |
| Male   | 1         | 1 – 2 years  | 2           | Lean     |        |            | Diarrhoea                | 2.817      | 165.76     | Positive | Old Maiduguri            |
| Female | 3         | >2 – 3 years | 22          | Moderate | 3      | Parity 3   | Occular/Nasal discharges | 1.553      | 89.43      | Positive | Old Maiduguri            |
| Male   | 1.5       | 1 – 2 years  | 16          | Lean     |        |            | Diarrhoea                | 2.273      | 132.91     | Positive | Old Maiduguri            |
| Female | 1.5       | 1 – 2 years  | 17          | Lean     | 2      | Parity 2   | Occular/Nasal discharges | 2.766      | 162.68     | Positive | Old Maiduguri            |
| Male   | 1         | 1 – 2 years  | 16          | Lean     |        |            | Rouh hair coat           | 2.846      | 167.51     | Positive | Old Maiduguri            |
| Female | 2         | 1 – 2 years  | 18          | Moderate | 3      | Parity 3   | Normal                   | 1.812      | 105.07     | Positive | Old Maiduguri            |
| Female | 1         | 1 – 2 years  | 16          | Lean     | 1      | Parity 1   | Normal                   | 2.547      | 149.46     | Positive | Old Maiduguri            |
| Female | 1.5       | 1 – 2 years  | 18          | Moderate | 2      | Parity 2   | Normal                   | 2.476      | 145.17     | Positive | Old Maiduguri            |
| Female | 2         | 1 – 2 years  | 18          | Moderate | 3      | Parity 3   | Normal                   | 2.652      | 155.8      | Positive | Old Maiduguri            |
| Male   | 1         | 1 – 2 years  | 17          | Moderate |        |            | Normal                   | 0.048      | -1.45      | Negative | Veterinary Field Station |
| Male   | 1.5       | 1 – 2 years  | 18          | Moderate |        |            | Normal                   | 0.04       | -1.93      | Negative | Veterinary Field Station |
| Female | 2         | 1 – 2 years  | 18          | Moderate | 2      | Parity 2   | Rouh hair coat           | 0.051      | -1.27      | Negative | Veterinary Field Station |
| Female | 2         | 1 – 2 years  | 18          | Lean     | 2      | Parity 2   | Occular/Nasal discharges | 0.045      | -1.63      | Negative | Veterinary Field Station |
| Female | 3         | 1 – 2 years  | 17          | Lean     | 2      | Parity 2   | Other ailments           | 0.204      | 7.97       | Negative | Veterinary Field Station |
| Male   | 2         | 1 – 2 years  | 18          | Moderate |        |            | Normal                   | 0.269      | 11.9       | Negative | Veterinary Field Station |
| Male   | 1.5       | 1 – 2 years  | 18          | Moderate |        |            | Normal                   | 0.174      | 6.16       | Negative | Veterinary Field Station |
| Male   | 1.5       | 1 – 2 years  | 18          | Moderate |        |            | Normal                   | 0.291      | 13.22      | Negative | Veterinary Field Station |
| Female | 2.5       | >2 – 3 years | 19          | Lean     | 1      | Parity 2   | Normal                   | 0.083      | 0.66       | Negative | Veterinary Field Station |
| Female | 1         | 1 – 2 years  | 16          | Moderate | 1      | Parity 2   | Normal                   | 0.114      | 2.54       | Negative | Veterinary Field Station |
| Female | 3         | >2 – 3 years | 18          | Lean     | 3      | Parity 3   | Normal                   | 0.139      | 4.05       | Negative | Veterinary Field Station |
| Male   | 1.5       | 1 – 2 years  | 15          | Lean     |        |            | Rouh hair coat           | 0.203      | 7.91       | Negative | Veterinary Field Station |

| Sex    | Age (yrs) | Age_Grp      | Weight (Kg) | BCS      | Parity | Parity_grp         | Clinical_Signs | OD_Reading | SP_percent | status   | location                 |
|--------|-----------|--------------|-------------|----------|--------|--------------------|----------------|------------|------------|----------|--------------------------|
| Male   | 2         | 1 – 2 years  | 16          | Moderate |        |                    | Normal         | 0.358      | 17.27      | Negative | Veterinary Field Station |
| Male   | 2         | 1 – 2 years  | 18          | Moderate |        |                    | Normal         | 0.19       | 7.13       | Negative | Veterinary Field Station |
| Male   | 1         | 1 – 2 years  | 17          | Moderate |        |                    | Normal         | 0.243      | 10.33      | Negative | Veterinary Field Station |
| Male   | 1         | 1 – 2 years  | 16          | Moderate |        |                    | Normal         | 0.178      | 6.4        | Negative | Veterinary Field Station |
| Male   | 2         | 1 – 2 years  | 18          | Lean     |        |                    | Normal         | 2.531      | 148.49     | Positive | Veterinary Field Station |
| Female | 1         | 1 – 2 years  | 17          | Moderate | 1      | Parity 2           | Normal         | 2.48       | 145.41     | Positive | Veterinary Field Station |
| Male   | 1.5       | 1 – 2 years  | 18          | Moderate |        |                    | Normal         | 0.489      | 25.18      | Negative | Veterinary Field Station |
| Male   | 2         | 1 – 2 years  | 26          | Moderate |        |                    | Normal         | 0.737      | 40.16      | Negative | Veterinary Field Station |
| Female | 4         | >3 years     | 24          | Moderate | 5      | Parity 5 and above | Normal         | 2.98       | 175.6      | Positive | Veterinary Field Station |
| Female | 2         | 1 – 2 years  | 20          | Moderate | 2      | Parity 2           | Normal         | 2.875      | 169.26     | Positive | Veterinary Field Station |
| Male   | 2         | 1 – 2 years  | 18          | Moderate |        |                    | Normal         | 0.346      | 16.55      | Negative | Veterinary Field Station |
| Male   | 4         | >3 years     | 26          | Moderate |        |                    | Normal         | 0.418      | 20.89      | Negative | Veterinary Field Station |
| Male   | 2         | 1 – 2 years  | 18          | Lean     |        |                    | Diarrhoea      | 2.846      | 167.51     | Positive | Veterinary Field Station |
| Female | 1         | 1 – 2 years  | 16          | Moderate | 1      | Parity 1           | Normal         | 2.766      | 162.68     | Positive | Veterinary Field Station |
| Female | 4         | >3 years     | 20          | Moderate | 4      | Parity 4           | Normal         | 2.846      | 167.51     | Positive | Veterinary Field Station |
| Female | 3         | >2 – 3 years | 21          | Fat      | 4      | Parity 4           | Normal         | 2.766      | 162.68     | Positive | Veterinary Field Station |
| Female | 3         | >2 – 3 years | 24          | Fat      | 3      | Parity 3           | Normal         | 2.846      | 167.51     | Positive | Veterinary Field Station |
| Female | 3         | >2 – 3 years | 24          | Fat      | 5      | Parity 5 and above | Normal         | 2.766      | 162.68     | Positive | Veterinary Field Station |
| Female | 4         | >3 years     | 23          | Moderate | 4      | Parity 4           | Normal         | 2.597      | 152.48     | Positive | Veterinary Field Station |
| Male   | 1         | 1 – 2 years  | 11          | Moderate |        |                    | Normal         | 2.633      | 154.65     | Positive | Veterinary Field Station |
| Female | 3         | >2 – 3 years | 21          | Moderate | 3      | Parity 3           | Normal         | 0.19       | 7.13       | Negative | Veterinary Field Station |
| Female | 3         | >2 – 3 years | 20          | Moderate | 3      | Parity 3           | Normal         | 2.563      | 150.42     | Positive | Veterinary Field Station |
| Female | 4         | >3 years     | 24          | Moderate | 5      | Parity 5 and above | Normal         | 1.362      | 77.9       | Positive | Veterinary Field Station |
| Female | 3         | >2 – 3 years | 20          | Moderate | 3      | Parity 3           | Normal         | 1.423      | 81.58      | Positive | Veterinary Field Station |
| Male   | 3         | >2 – 3 years | 20          | Moderate |        |                    | Normal         | 0.58       | 30.68      | Negative | Veterinary Field Station |
| Male   | 2         | 1 – 2 years  | 19          | Moderate |        |                    | Normal         | 0.476      | 24.4       | Negative | Veterinary Field Station |
| Female | 3         | >2 – 3 years | 20          | Moderate | 3      | Parity 3           | Normal         | 1.485      | 85.33      | Positive | Veterinary Field Station |
| Female | 4         | >3 years     | 24          | Moderate | 5      | Parity 5 and above | Normal         | 2.328      | 136.23     | Positive | Veterinary Field Station |
| Male   | 3         | >2 – 3 years | 22          | Moderate |        |                    | Normal         | 2.456      | 143.96     | Positive | Veterinary Field Station |
| Female | 1.5       | 1 – 2 years  | 18          | Moderate | 2      | Parity 2           | Normal         | 2.48       | 145.41     | Positive | Veterinary Field Station |
| Male   | 2         | 1 – 2 years  | 20          | Fat      |        |                    | Normal         | 0.29       | 13.16      | Negative | Veterinary Field Station |

| Sex    | Age (yrs) | Age_Grp      | Weight (Kg) | BCS      | Parity | Parity_grp | Clinical_Signs  | OD_Reading | SP_percent | status   | location                 |
|--------|-----------|--------------|-------------|----------|--------|------------|-----------------|------------|------------|----------|--------------------------|
| Female | 3         | >2 – 3 years | 26          | Fat      | 4      | Parity 4   | Normal          | 2.679      | 157.43     | Positive | Veterinary Field Station |
| Female | 3         | >2 – 3 years | 25          | Moderate | 4      | Parity 4   | Normal          | 0.381      | 18.66      | Negative | Veterinary Field Station |
| Female | 1         | 1 – 2 years  | 13          | Moderate | 1      | Parity 1   | Normal          | 0.227      | 9.36       | Negative | Veterinary Field Station |
| Female | 3         | >2 – 3 years | 23          | Fat      | 3      | Parity 3   | Normal          | 0.411      | 20.47      | Negative | Veterinary Field Station |
| Male   | 1.5       | 1 – 2 years  | 16          | Moderate |        |            | Normal          | 0.237      | 9.96       | Negative | Veterinary Field Station |
| Female | 3         | >2 – 3 years | 18          | Moderate | 3      | Parity 3   | Normal          | 2.846      | 167.51     | Positive | Old Maiduguri            |
| Male   | 2         | 1 – 2 years  | 20          | Moderate |        |            | Nasal discharge | 2.818      | 165.82     | Positive | Old Maiduguri            |
| Female | 3         | >2 – 3 years | 20          | Moderate | 2      | Parity 2   | Normal          | 2.876      | 169.32     | Positive | Old Maiduguri            |
| Female | 3         | >2 – 3 years | 20          | Moderate | 4      | Parity 4   | Normal          | 2.58       | 151.45     | Positive | Old Maiduguri            |
